# Supplementary material for: The LIKE SEX FOUR2 regulates root development by modulating reactive oxygen species homeostasis in Arabidopsis
Source: PubMed Central journal article supplement (PMC4923905; doi:10.1038/srep28683), 2016-06-28
Supplement: srep28683-s1.pdf [file srep28683-s1.pdf]

# **The *LIKE SEX FOUR2* regulates root development by modulating reactive oxygen species homeostasis in *Arabidopsis***

Pingzhi Zhao<sup>1\*</sup>, Lubomir N. Sokolov<sup>1\*</sup>, Jian Ye<sup>3</sup>, Cheng-Yi Tang<sup>1</sup>, Jisen Shi<sup>4</sup>, Yan Zhen<sup>4</sup>, Wenzhi Lan<sup>1</sup>, Zhi Hong<sup>1</sup>, Jinliang Qi<sup>1</sup>, Gui-Hua Lu<sup>1\*</sup>, Girdhar K. Pandey<sup>2\*</sup> & Yong-Hua Yang<sup>1\*</sup>

## **Supplementary information**

### **Figure S1. Molecular characterization of the *lsf2-1* mutant line.**

- a.** Schematic representation of the *lsf2-1* allele, with the T-DNA insertion shown as inverted triangles.
- b.** Genotyping of the *lsf2-1* mutant. P1, P2, and SAIL\_LB3 represent the specific primers used to screen and confirm the homozygous line of the *lsf2-1* mutant by RT-PCR. Genomic DNA from Col-0 plants was used as a positive control.
- c.** Analysis of *LSF2* expression by RT-PCR in Col-0 and *lsf2-1* mutant. Transcriptional expression of *ACTIN2* was used as a positive control.
- d.** Relative expression levels of *LSF2* in leaf and root of Col-0 plants under oxidative stress conditions. Data represent mean values  $\pm$ SE (n =6). The mean value of *LSF2* expression in leaves was significantly different from that of root as determined by student's t-test analysis (\*\*, P < 0.01).

### **Figure S2. Molecular characterization of functional complementation of the *lsf2-1* mutant (*lsf2-1:AtLSF2*).**

- a.** Genomic insertion location of *gLSF2* in *lsf2-1:AtLSF2* transgenic lines. The schematic diagram shows *Arabidopsis* genes. The *gLSF2* insertion position is indicated by an arrow. White box, UTR; Gray box, exon coding region; black line, intron region; dotted line, intergenic region.
- b.** Relative expression levels of *LSF2* in Col-0, *lsf2-1*, and four complemented lines of *lsf2-1:AtLSF2* were determined. Data represent mean values  $\pm$ SE (n =6).

**Figure S3. *In vitro* pull-down assays investigating the interaction between LSF2 and MPK8.**

LSF2-His<sub>6</sub> was used to pull down GST or GST-MPK8. Immunoblot analysis was performed using anti-GST antibody to detect the associated proteins.

**Figure S4. The expression level of *RbohD* in *lsf2-1* mutant and wild type plants was detected under oxidative stress conditions.**

The relative expression of *RbohD* under oxidative stress (SA, H<sub>2</sub>O<sub>2</sub> or MV) was detected by qPCR in Col-0 and *lsf2-1* plants. Data represent mean values ±SE (n =6). *ACTIN2* was used as a positive control.

**Figure S5. LSF2 phosphatase activity assay.**

Time course of protein phosphatase activity of LSF2 was examined, with *para*-nitrophenyl phosphate (pNPP) used as substrate.

**Figure S6. Phenotypic analysis of wild type, *lsf2-1* mutant and complemented line under SA induced oxidative stress.**

Under 50 μM SA treatment, the severity of curly dwarf symptom in *lsf2-1* leaves was increased as compared to Col-0 and complemented line (*lsf2-1:AtLSF2* #1) plants.

**Figure S7. The expression levels of *SCN1*, *CPC* and *PIN3* in *lsf2-1* mutant and wild type plants were detected under oxidative stress conditions.**

The relative expression of *SCN1* (a), *CPC* (b) and *PIN3* (c) under oxidative stress (SA, H<sub>2</sub>O<sub>2</sub> or MV) was detected by qPCR in Col-0 and *lsf2-1* plants. Data represent mean values ±SE (n =6). *ACTIN2* was used as a positive control.

**Table S1. Primer sequences used in this study.**

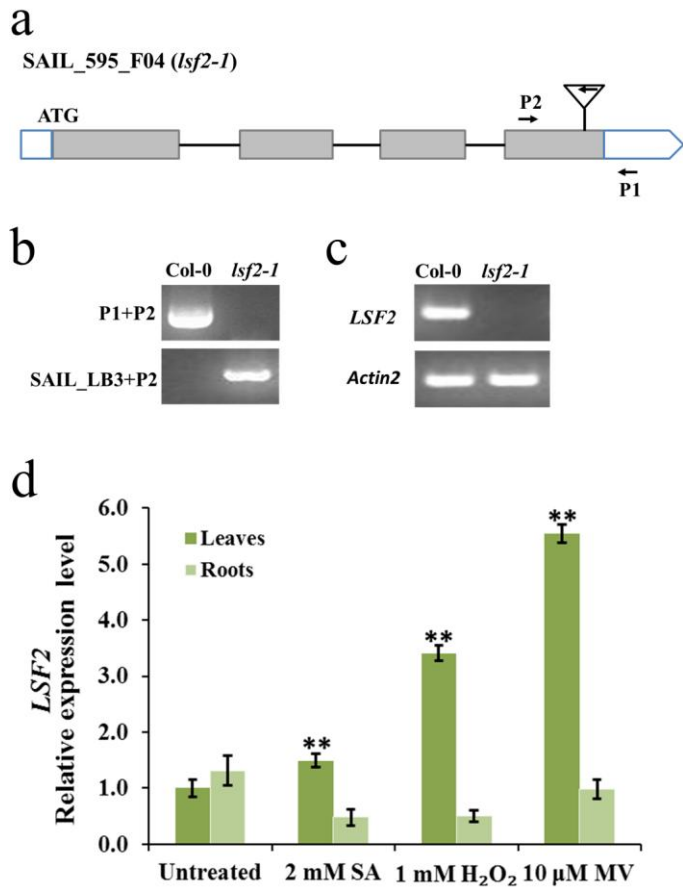

**Figure S1. Molecular characterization of the *lsf2-1* mutant line.**

a

*lsf2-1*: *AtLSF2* transgenic lines

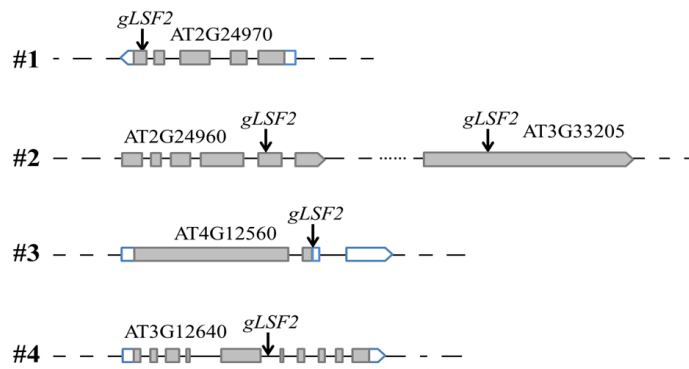

b

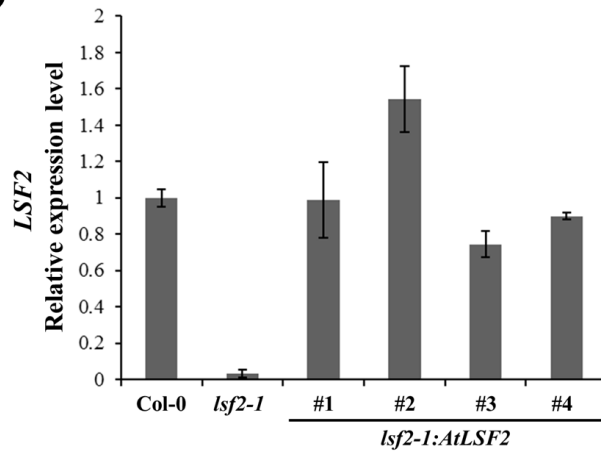

**Figure S2. Molecular characterization of functional complementation of the *lsf2-1* mutant (*lsf2-1*:*AtLSF2*).**

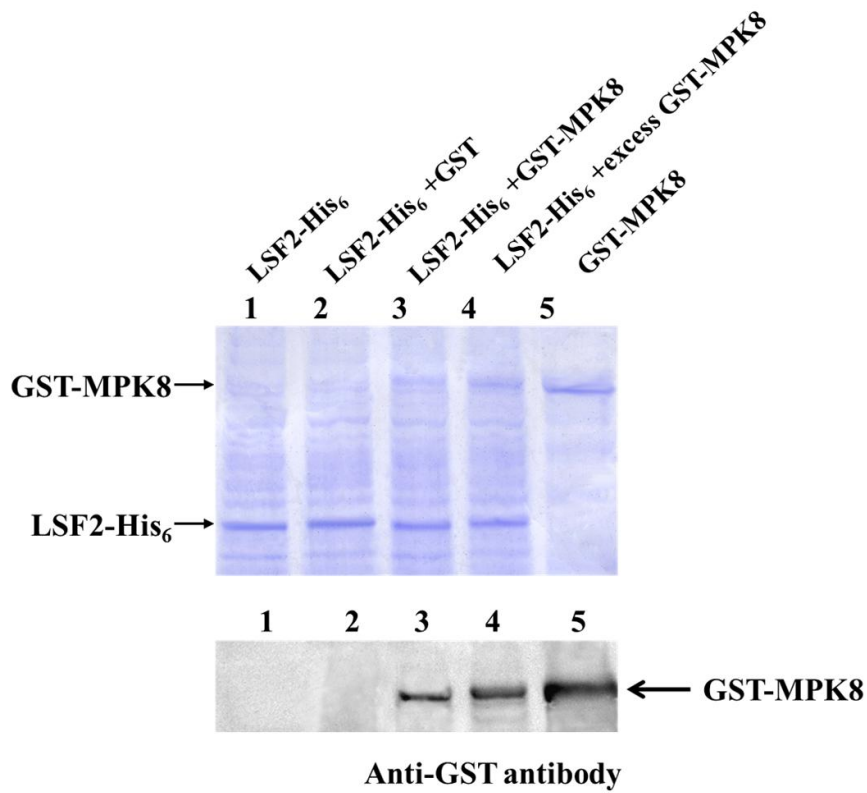

Figure S3. *In vitro* pull-down assays investigating the interaction between LSF2 and MPK8

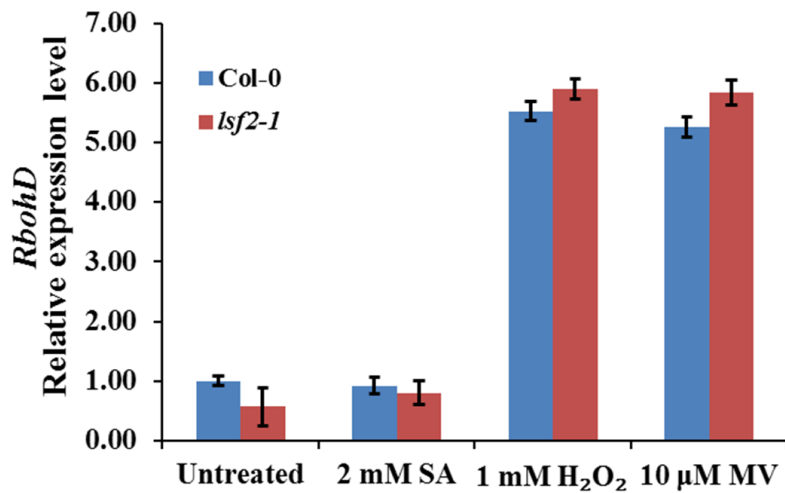

Figure S4. The expression level of *RbohD* in *lsf2-1* mutant and wild type plants was detected under oxidative stress conditions.

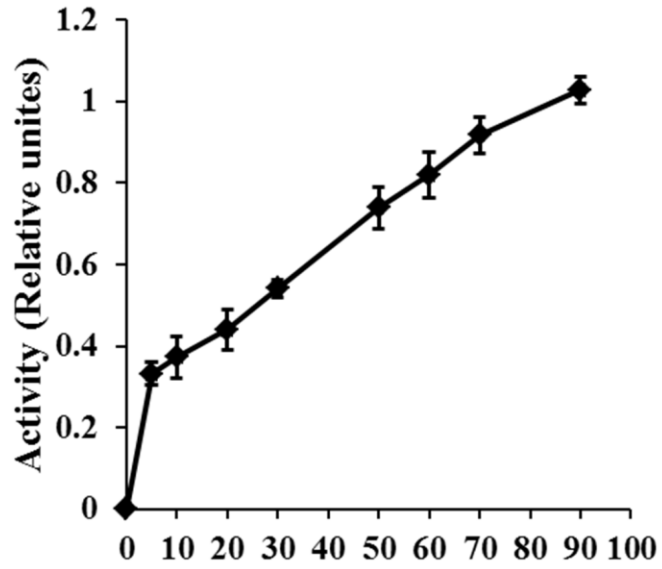

Figure S5. LSF2 phosphatase activity assay

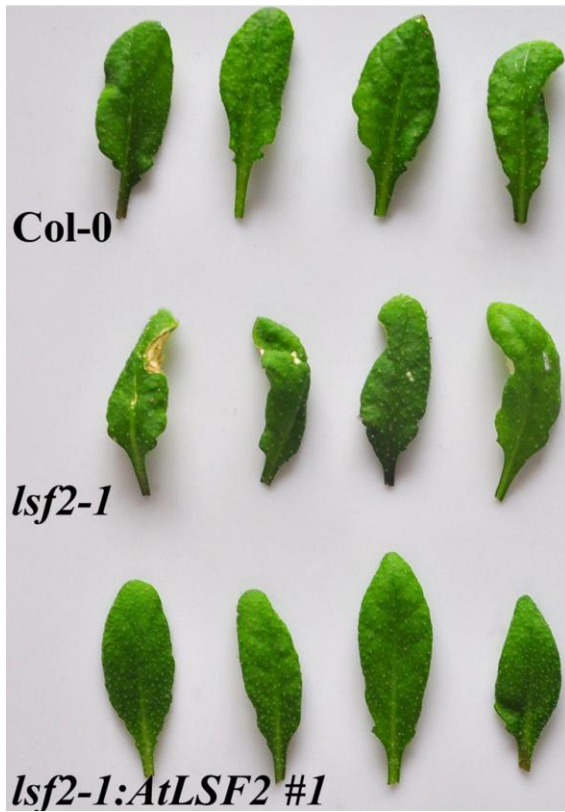

Figure S6. Phenotypic analysis of wild type, *lsf2-1* mutant and complemented line under SA induced oxidative stress.

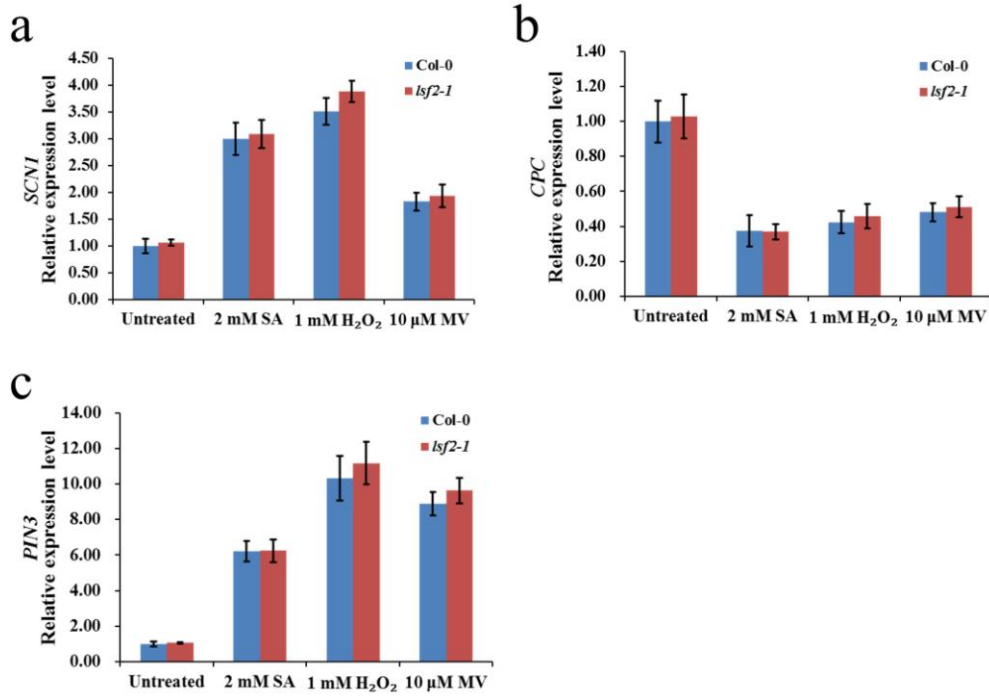

**Figure S7.** The expression levels of *SCN1*, *CPC* and *PIN3* in *lsf2-1* mutant and wild type plants were detected under oxidative stress conditions.

**Table S1. Primer sequences used in this study.**

|                                                                                       |     |                                      |
|---------------------------------------------------------------------------------------|-----|--------------------------------------|
| SAIL_LB3                                                                              |     | TAGCATCTGAATTCATAACCAATCTC           |
| P1                                                                                    |     | GGTATCAAAGCGTCCATGTGG                |
| P2                                                                                    |     | GTCGTGCCATCACTTTAACAGT               |
| LSF2                                                                                  | Fw  | ATGAGTGTGATTGGAAGCAAG                |
|                                                                                       | Rv  | TCAGGTTCCACGGAGGGCCC                 |
| <i>ACTIN2</i>                                                                         | Fw  | CTGTTCTCTCCTTGTACGCCAGT              |
|                                                                                       | Rv  | CGGGTAATTCATAGTTCTTCTCGAT            |
| <i>gLSF2</i>                                                                          | Fw  | TTTCGCC GGCTGAGGGAGAAAAGCAGACAATGTGC |
|                                                                                       | Rv  | GATTAGTCTTGCTTGGTTTGTAAAATGATGAAG    |
| <i>LSF2</i> -qPCR                                                                     | Fw  | AGATTTTGATCCACTTTCGTTG               |
|                                                                                       | Rv  | GTTCTTGAATCAACTTCCTTTC               |
| <i>RHD6</i> -qPCR                                                                     | Fw  | GCCCTAGATCCACCGAAACTCC               |
|                                                                                       | Rv  | TGGCTGCTAGGCTTTGTGG                  |
| MPK8                                                                                  | Fw  | CAAGGGTACCATGGGTGGTGGTGGGAATCTCG     |
|                                                                                       | Rv  | CAAGCTCGAGGAATTGTGAAGAGAAGCA         |
| <i>MPK8</i> -qPCR                                                                     | Fw  | CCTTCTGGAACGCCTGCTTG                 |
|                                                                                       | Rv  | GCTGATCACCACCACGAAGG                 |
| Specific primers<br>for screening<br>independent<br>complementary<br>transgenic lines | SP1 | TGATATCTAGGGACCTGCAGGCATGC           |
|                                                                                       | SP2 | AAAGCCAGTCCGCAGAAACGGT               |
|                                                                                       | SP3 | CTTGCAGTGGGCTTACATGGCG               |
| <i>SCN1</i> -qPCR                                                                     | Fw  | ACTCTTGATCCGGAAGTGAGG                |
|                                                                                       | Rv  | TGTCCACTTTGACACCGG                   |
| <i>CPC</i> -qPCR                                                                      | Fw  | TGGATAAACGACGACGG                    |
|                                                                                       | Rv  | ACGCCGTGTTTCATAAGC                   |
| <i>PIN3</i> -qPCR                                                                     | Fw  | TTAGTTTGGGGTTGTTTCATGG               |
|                                                                                       | Rv  | CCCGAGTAGAATGTAGTAAACC               |
